# Supplementary material
Source: MDPI journal article supplement (https://www.mdpi.com/2073-4441/14/21/3559)
Supplement: s1 [file s1]

## Supplementary files

**Figures S1** Pseudo first order kinetics model of arsenate adsorption on MgO-IBC composites

**Figures S2** Arrhenius plot of arsenate adsorption on MgO-IBC composites at pH 5

**Figures S3** Vant Hoff's plot for arsenate adsorption on MgO-IBC composites

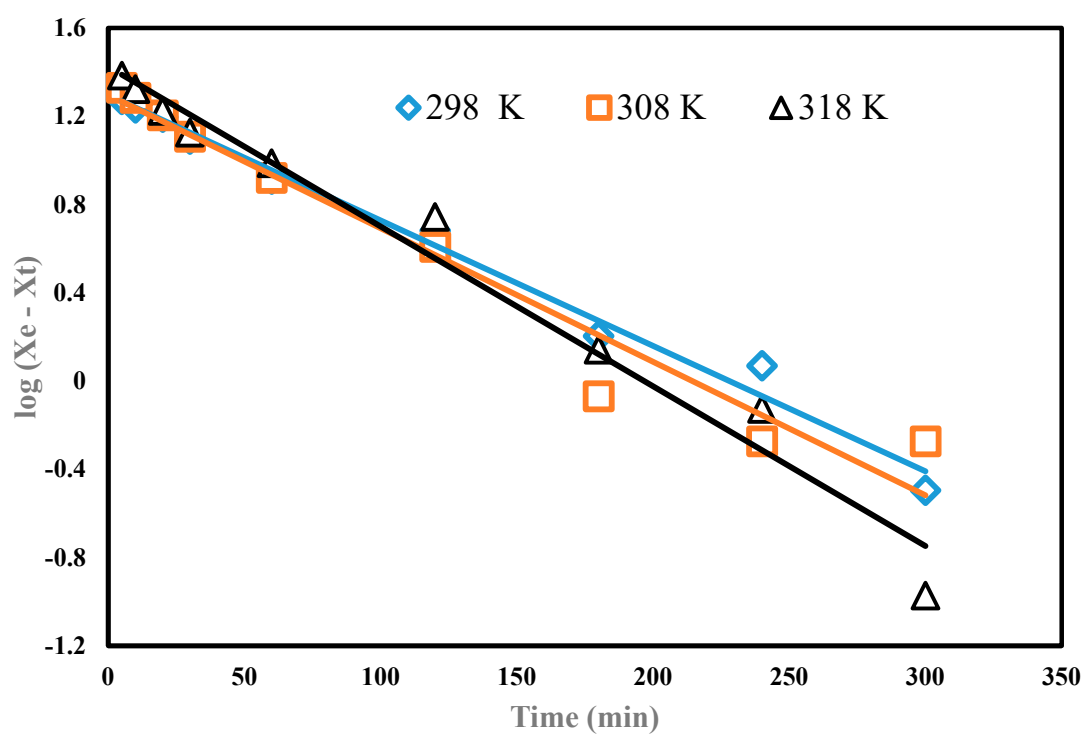

**Figures S1** Pseudo first order kinetics model of arsenate adsorption on MgO-IBC composites

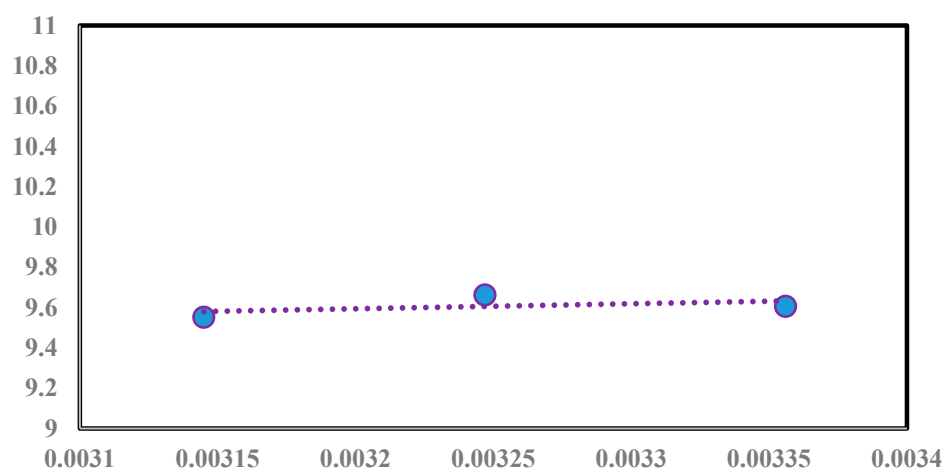

**Figures S2** Arrhenius plot of arsenate adsorption on MgO-IBC composites at pH 5

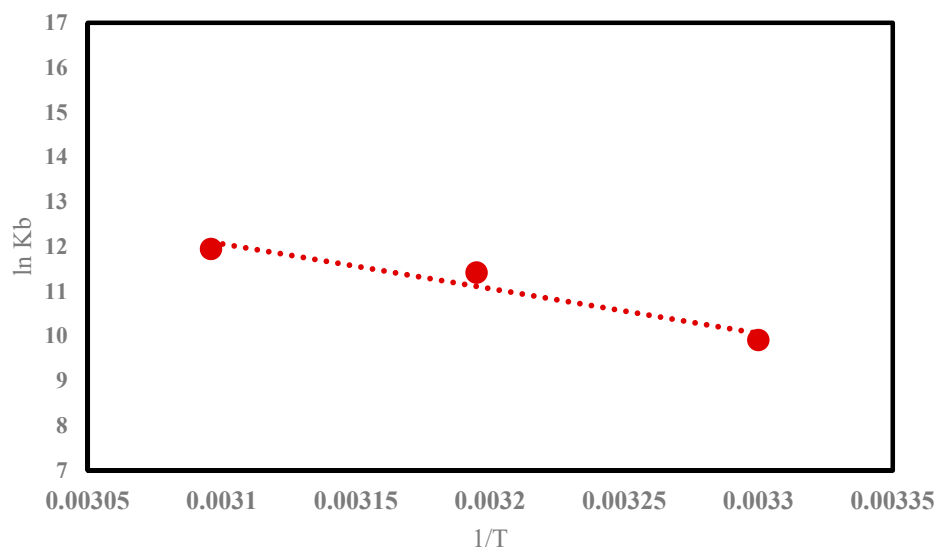

**Figures S3** Vant Hoff's plot for arsenate adsorption on MgO-IBC composites
